# Supplementary figures and images for: The Growth-Inhibitory Effect of Increased Planting Density Can Be Reduced by Abscisic Acid-Degrading Bacteria
Source: MDPI journal article supplement (doi:10.3390/biom13111668), 2023-11-19

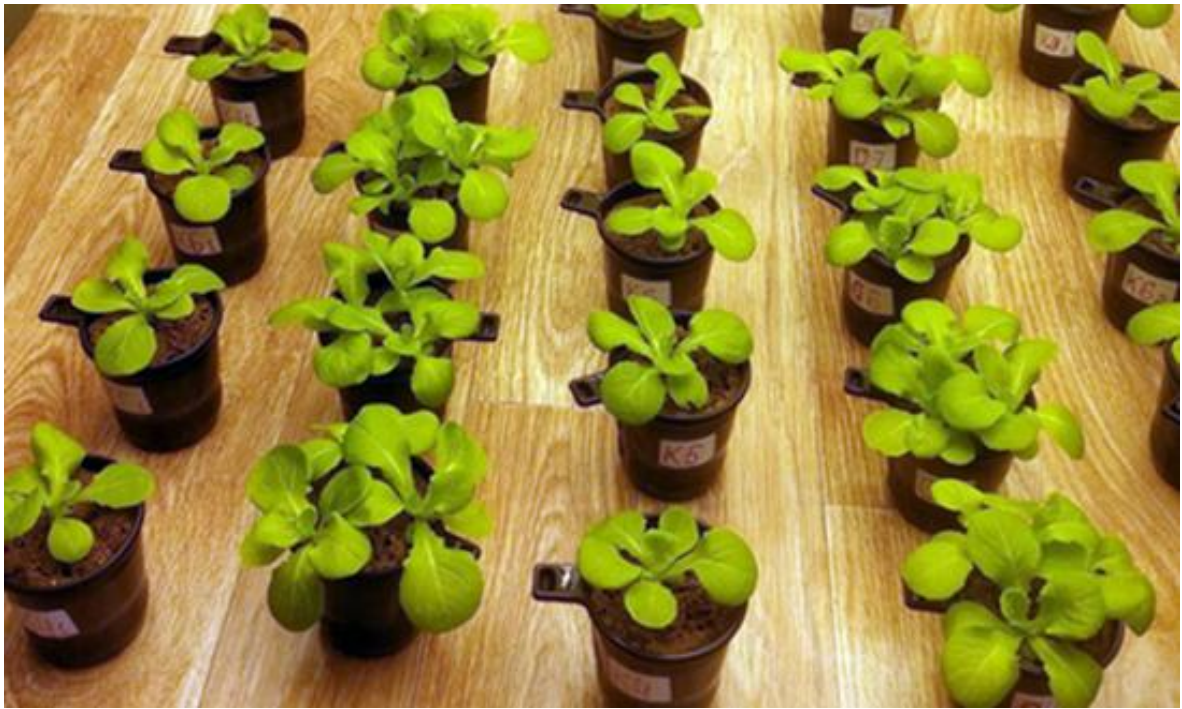

**Non-inoculated**

**Inoculated** with  
*P. Plecoglossicida* 2.4-D

Supplement: s1 [file s1]
